# Supplementary material
Source: Research Square preprint supplement (doi:10.21203/rs.3.rs-9719066/v1)
Supplement: Supplementary file 1 [file b4b89399273ee09325468e33.docx]

**George Zodo**

**Deakin University, Faculty of Science, Engineering and Built Environment (SEBE)**

**School of Engineering, Waurn Ponds Campus, Victoria, Australia**

Email: gzodo@deakin.edu.au

**Date**: 25 May 2026

**Editor‑in‑Chief**

Discover Fluid Mechanics

Springer Nature

**Subject: Supplementary Movie**

Dear Editor,

The supplementary movie presents a side-by-side comparison of the liquid-only and solid-liquid Eulerian-Lagrangian simulations of respiratory particle transport during face-to-face speaking. The full Lagrangian droplet population across all particle sizes is visualised throughout the simulation. Aerosol particles with diameters below 10 µm are additionally coloured according to their liquid content, where red indicates fully liquid droplets and blue represents fully evaporated particles containing only the residual solid core.

A centre-plane temperature slice is included to visualise the thermal plumes generated by the seated individuals. The simulations demonstrate that larger droplets are strongly affected by gravity and predominantly settle onto nearby surfaces, whereas smaller aerosol particles remain suspended and are transported by the local flow structures and buoyancy-driven thermal plumes.

The comparison further highlights that the solid–liquid simulation predicts a substantially larger number of persistent aerosol particles being entrained into the thermal plume and transported beyond the immediate vicinity of the speaker. This behaviour emphasises the importance of accurately capturing long-range aerosol transport when assessing airborne disease transmission in indoor environments. At the same time, it motivates the use of computationally efficient Eulerian–Eulerian approaches for large-scale simulations of hospitals, schools, office buildings, and other occupied indoor spaces, where fully resolved Eulerian-Lagrangian simulations may become prohibitively expensive.

Regards,

George Zodo
